# Supplementary material
Source: publisher figshare collection journal article supplement (https://acs.figshare.com/ndownloader/files/23773018)
Supplement: Supplementary file 1 [file 23773018]

## Supporting Information

### Galvanic Redox Potentiometry-Based Microelectrode Array for Synchronous Ascorbate and Single-Unit Recordings in Rat Brain

Huan Wei,<sup>†,‡</sup> Lijuan Li,<sup>§</sup> Jing Jin,<sup>†,‡</sup> Fei Wu,<sup>\*,†,‡</sup> Ping Yu,<sup>†,‡</sup> Furong Ma,<sup>§</sup> Lanqun Mao<sup>\*,†,‡</sup>

<sup>†</sup> *Beijing National Laboratory for Molecular Sciences, Key Laboratory of Analytical Chemistry for Living Biosystems, Institute of Chemistry, The Chinese Academy of Sciences, Beijing 100190, China.*

<sup>‡</sup> *University of Chinese Academy of Sciences, Beijing 100049, China.*

<sup>§</sup> *Department of Otorhinolaryngology, Peking University Third Hospital, Beijing 100083, China*

#### Table of contents

**Figure S1.** Reciprocal influence between amperometric sensing and electrophysiological recording.

**Figure S2.** Enlargement of the short period (95-250 s) of electrochemical and electrophysiological signals from **Figure 5**.

\* Corresponding Author. E-mail: lqmao@iccas.ac.cn, wufei317@iccas.ac.cn. Fax: +86-10-62559373.

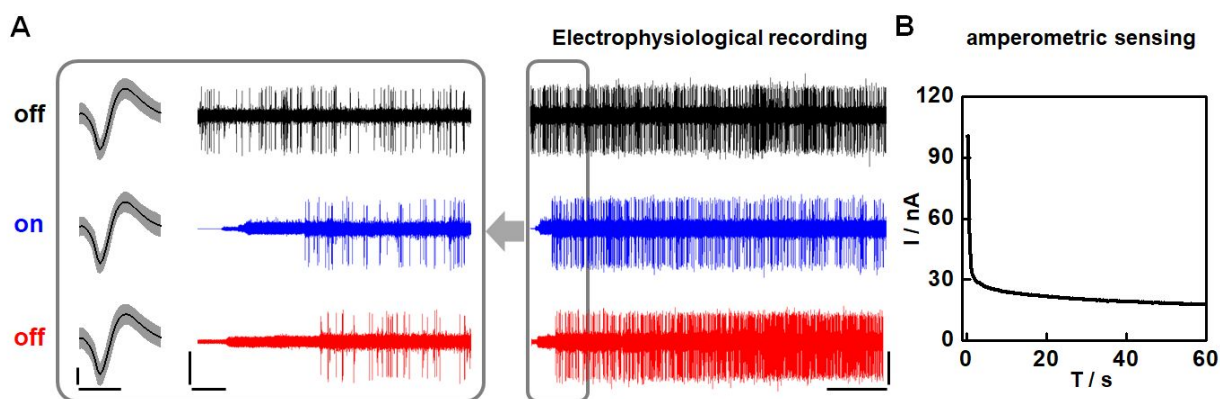

**Figure S1.** Reciprocal influence between amperometric sensing and electrophysiological recording. **(A)** Representative extracellular action potential traces recorded by MEAs before (black), during (blue) and after amperometric recording. Scale bars, 100  $\mu$ V (vertical), 10 s (horizontal). Enlargement of the area is indicated with the gray box shown in the right panel (left, vertical scale bars, 100  $\mu$ V; horizontal scale bar, 1 s) and its corresponding waveforms of detected neuron (vertical scale bar, 50  $\mu$ V; horizontal scale bar, 0.4 ms). Switch-on and switch-off of amperometric sensing are indicated as “on” and “off”. **(B)** Plot of current vs. time recorded with the working electrode polarized at 30 mV over 60 s during electrophysiological recording.

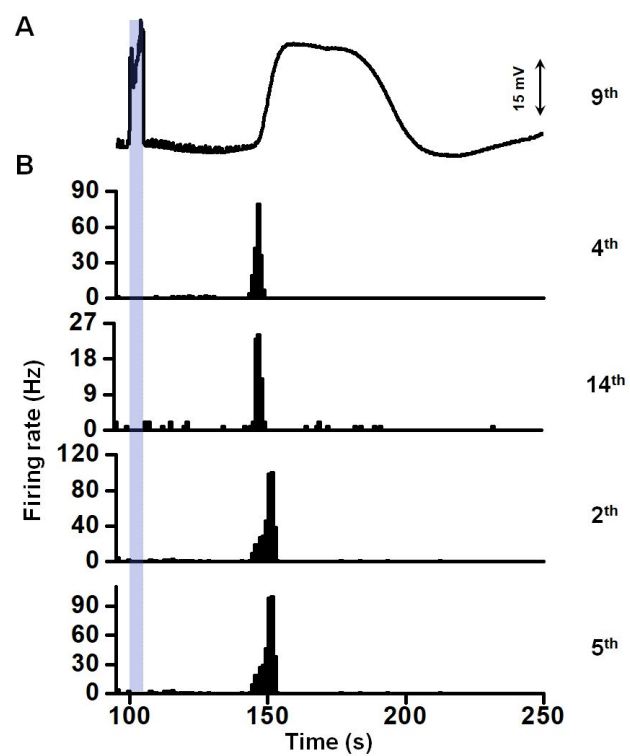

**Figure S2.** Enlargement of the short period (95-250 s) of electrochemical signal (A) from **Figure 5B** and spike firing rates (B) from **Figure 5C**.
